# Supplementary material for: Aquilaria crassna Leaf Extract Ameliorates Glucose-Induced Neurotoxicity In Vitro and Improves Lifespan in Caenorhabditis elegans
Source: MDPI journal article supplement (doi:10.3390/nu14173668), 2022-09-05
Supplement: s1 [file s1]

**Table S1.** The results of method validation between co-crystalized ligand at the original active site of IGFR (PDB ID: 5FXS)

| Ligand                                                                                                                                                                      | RMSD (Å)       | Binding energy (kcal/mol) | Amino acid interaction            |                                                                                |                    |
|-----------------------------------------------------------------------------------------------------------------------------------------------------------------------------|----------------|---------------------------|-----------------------------------|--------------------------------------------------------------------------------|--------------------|
|                                                                                                                                                                             |                |                           | Hydrogen bond                     | Hydrophobic bond                                                               | Electrostatic bond |
| 2-[4-[4-[(6Z)-5-chloranyl-6-pyrazolo[1,5-a]pyridin-3-ylidene-1H-pyrimidin-2-yl]amino]-3,5-dimethyl-pyrazol-1-yl]piperidin-1-yl]-N,N-dimethyl-ethanamide (crystal structure) | Not determined | Not determined            | GLU1080<br>MET1082                | LEU1005 (2)<br>VAL1013<br>ALA1031<br>LYS1033<br>MET1142<br>LEU1081             | -                  |
| 2-[4-[4-[(6Z)-5-chloranyl-6-pyrazolo[1,5-a]pyridin-3-ylidene-1H-pyrimidin-2-yl]amino]-3,5-dimethyl-pyrazol-1-yl]piperidin-1-yl]-N,N-dimethyl-ethanamide (redocking)         | 2.48           | -9.88                     | GLU1080<br>MET1082<br>ASP1086 (2) | LEU1005 (3)<br>VAL1013 (3)<br>ALA1031 (2)<br>LYS1033 (2)<br>MET1079<br>LEU1081 | -                  |

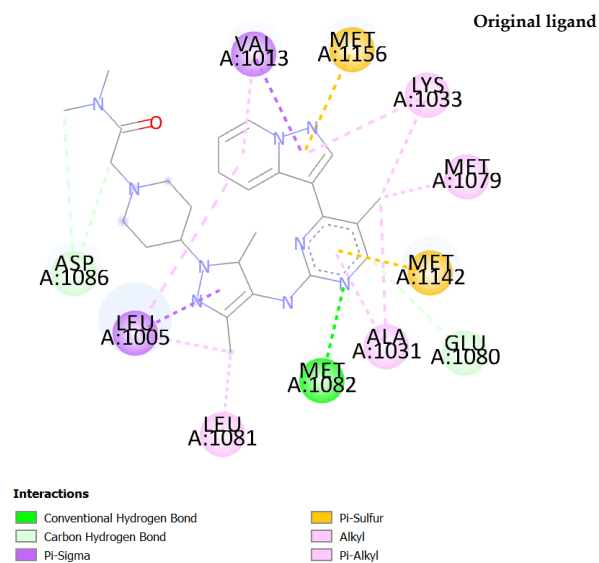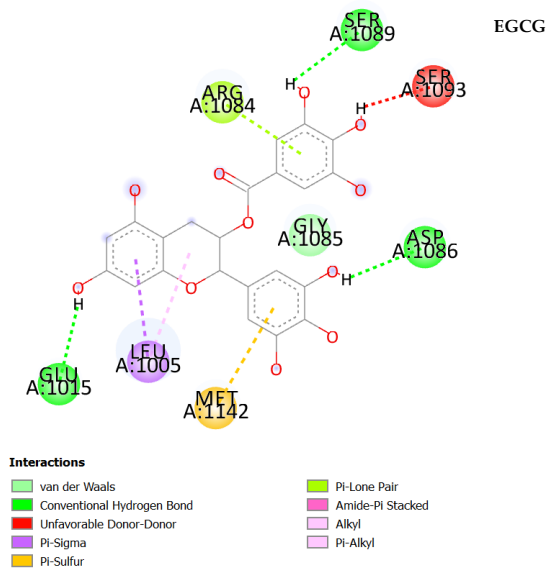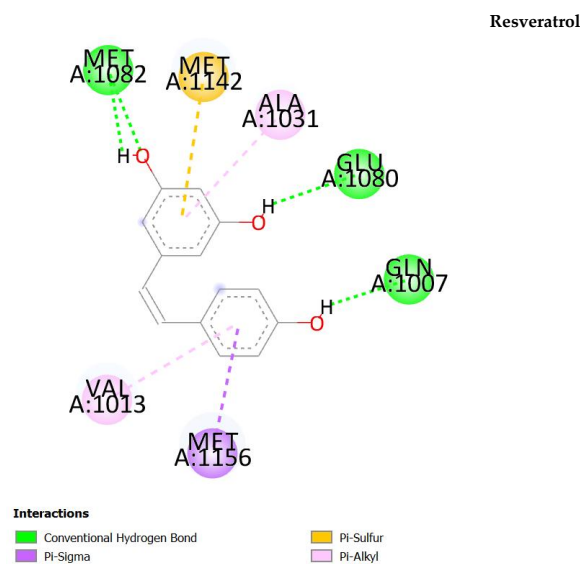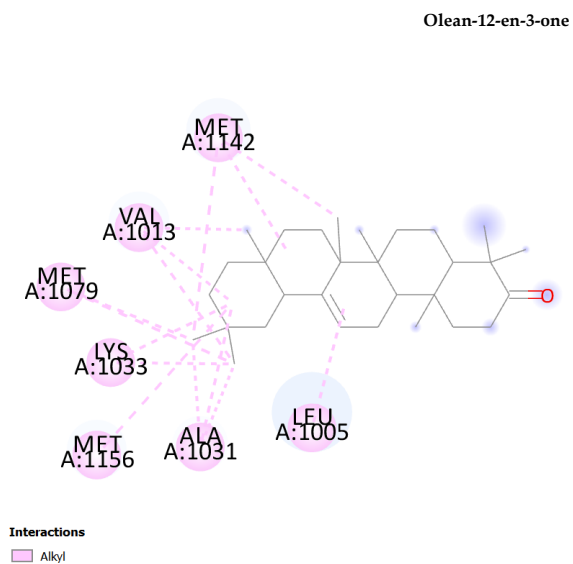

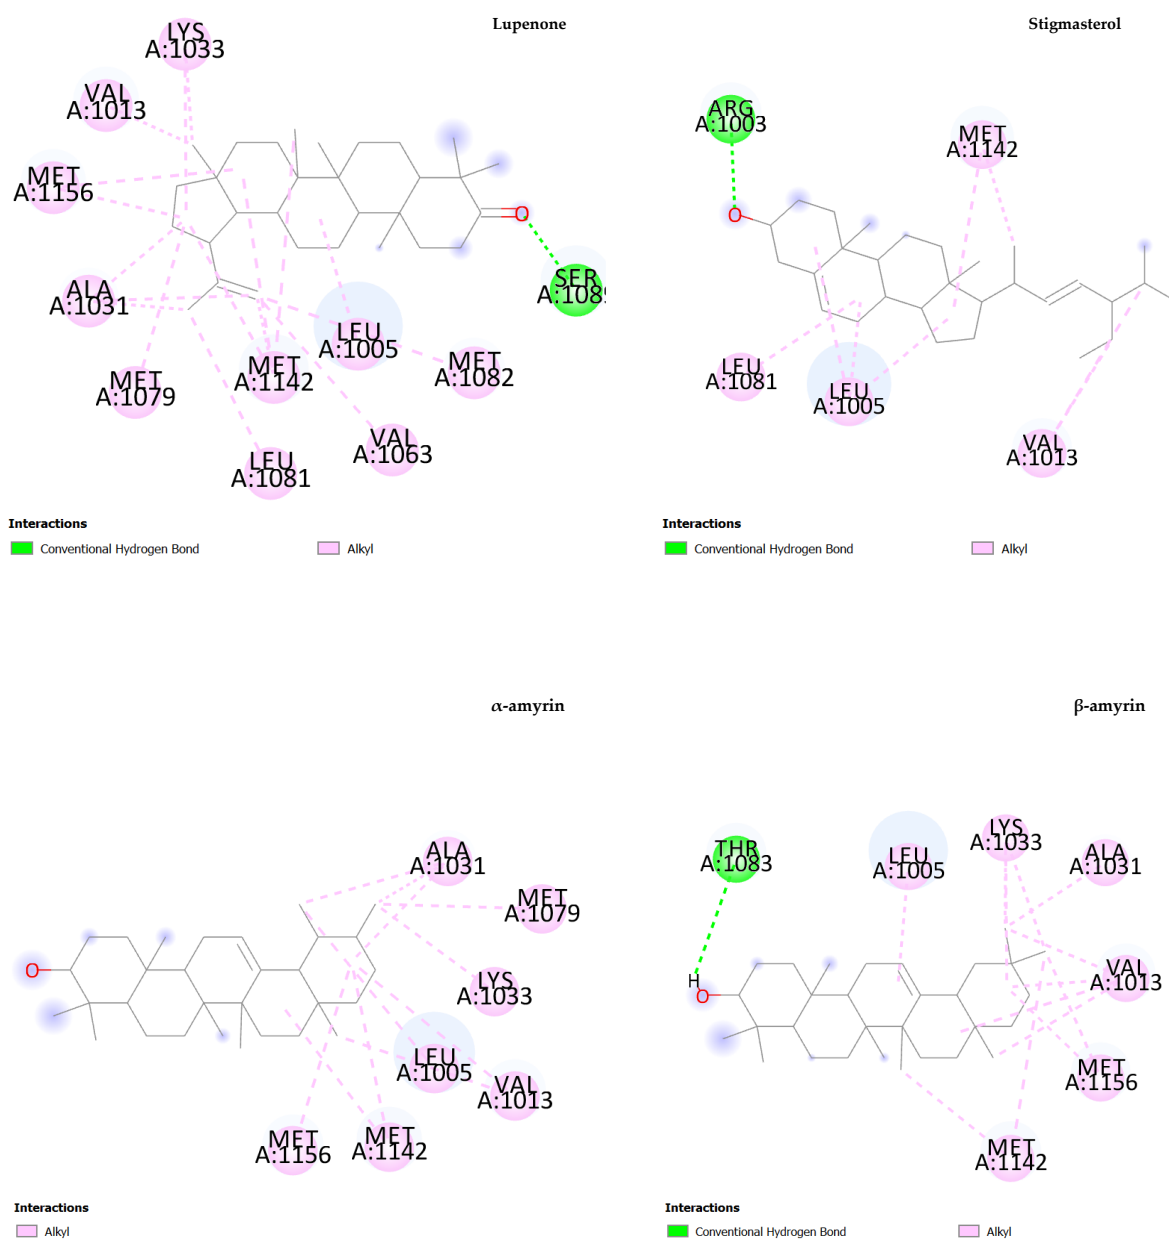

**Figure S1.** The results of the molecular docking study of IGFR were represented by 2D diagram of phytochemical-receptor interactions.

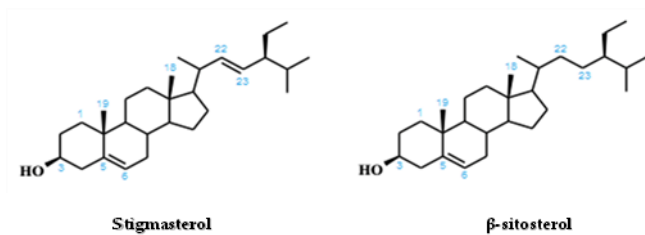

**Figure S2.** Structure of compound 1 (stigmasterol) and compound 2 ( $\beta$ -sitosterol) from fraction ACH3.

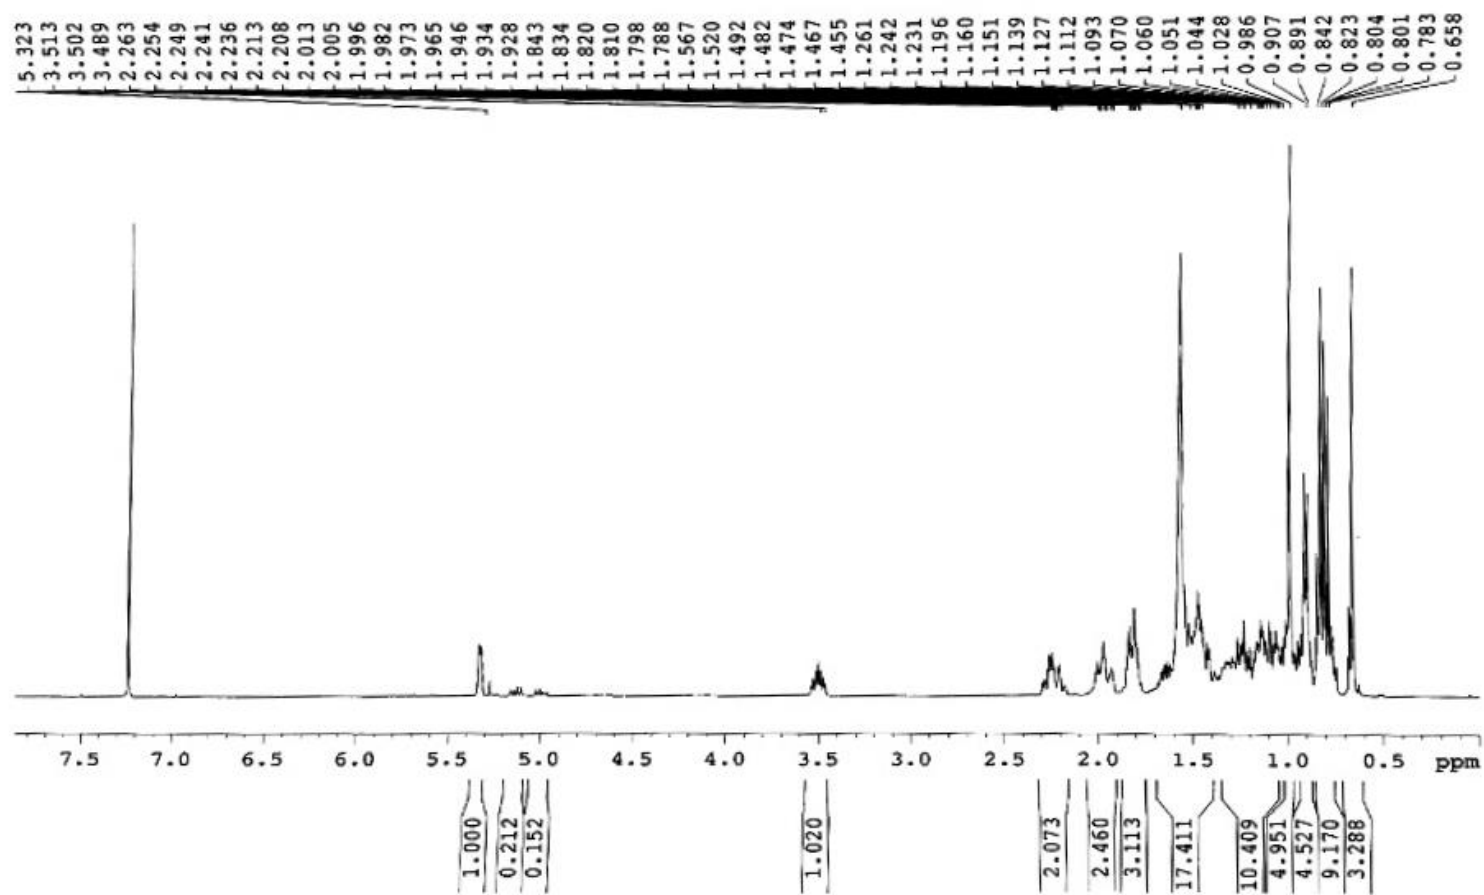

**Figure S3.** <sup>1</sup>H-NMR spectrum of a mixture of β-sitosterol and stigmasterol (compound 1 and 2) in CDCl<sub>3</sub>

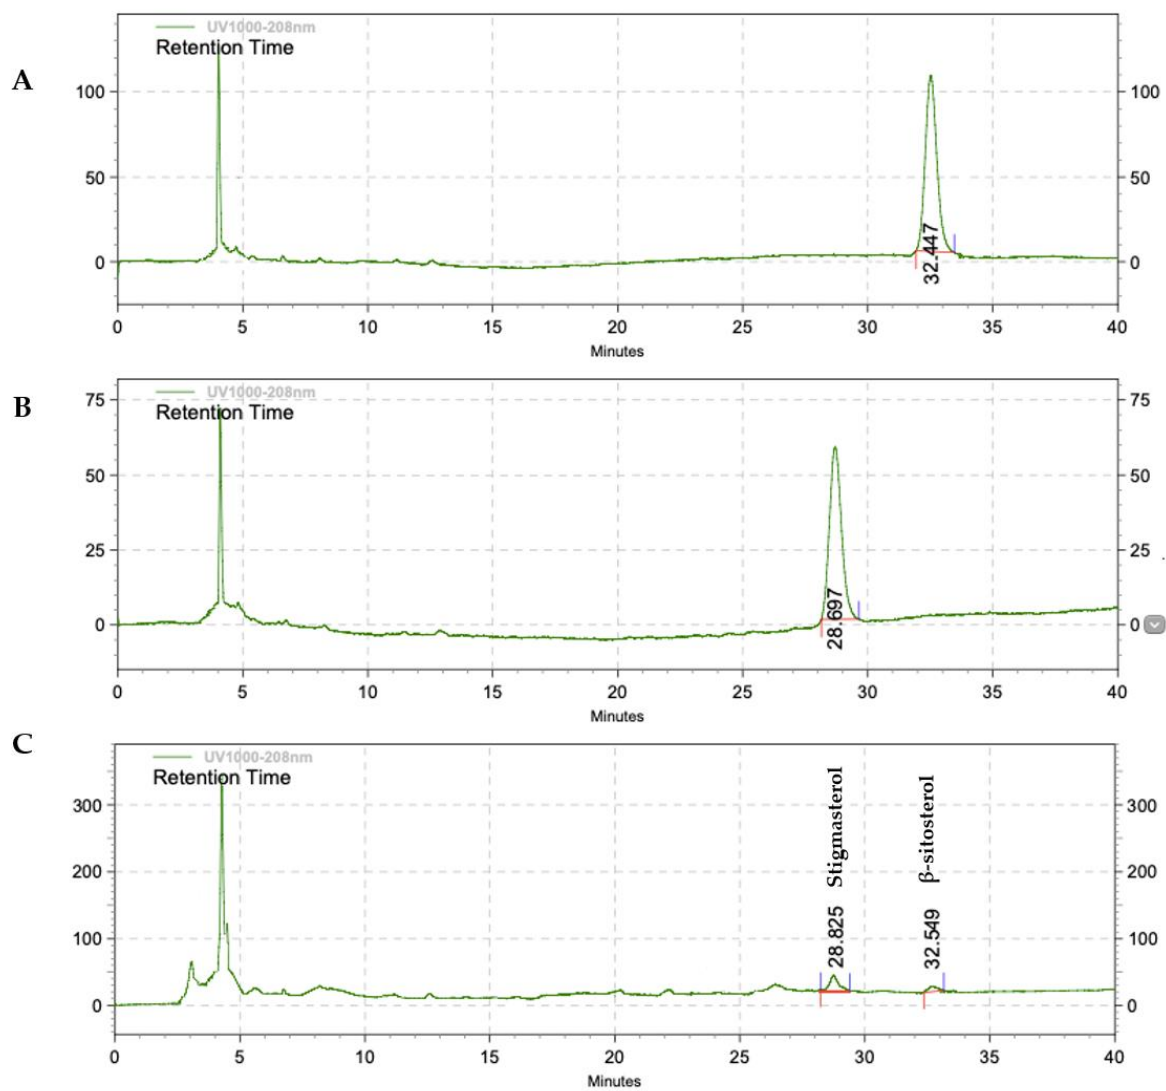

**Figure S4.** Reverse-phase HPLC analysis of standard  $\beta$ -sitosterol (A) and stigmasterol (B). The extract of ACH showing the presence of both  $\beta$ -sitosterol and stigmasterol (C).
